# Supplementary material
Source: publisher figshare collection journal article supplement (https://asha.figshare.com/articles/dataset/_/25521052)
Supplement: Supplementary file 1 [file 1]

**Supplemental Material S1.** (A) Instructions provided to the children during recording; (B) word-level task: 21 Korean contrastive monosyllabic real words and corresponding International Phonetic Alphabet (IPA) transcription; (C) sentence-level task: three Korean sentences and corresponding IPA transcription; (D) reliability of acoustic measures: Pearson product–moment correlation between the first and second measurements and mean absolute difference; and (E) reliability of intelligibility-related measures: Intraclass correlation coefficient (ICC) and corresponding 95% confidence interval.

*A. Instructions provided to the children during recording.*

For the big mouth and the strong voice conditions, the children with dysarthria were instructed in Korean to “speak with a big mouth” [입을 크게 벌려요.] and “speak with a strong voice,” [큰 소리로 말해요.], respectively.

*B. 21 monosyllabic Korean words and corresponding International Phonetic Alphabet (IPA) transcription.*

| Korean word | IPA transcription | Korean word | IPA transcription | Korean word | IPA transcription |
|-------------|-------------------|-------------|-------------------|-------------|-------------------|
| 달*          | [dal]*            | 딸           | [ʈal]             | 발           | [pal]             |
| 방           | [ban]             | 굴*          | [kul]*            | 꿀           | [kʰul]            |
| 침           | [tɕʰim]           | 잠           | [dʒam]            | 쌀           | [sʰal]            |
| 탈           | [tʰal]            | 땀           | [ʈam]             | 팔           | [pʰal]            |
| 병           | [pɲʌŋ]            | 쿨           | [kʰul]            | 공           | [koŋ]             |
| 짬           | [tɕim]            | 짐*          | [dʒim]*           | 산           | [san]             |
| 빨           | [pal]             | 콩           | [kʰoŋ]            | 살           | [sal]             |

\* Words with corner vowels /a, i, u/ selected for word vowel space area (VSA) calculation

*C. Four Korean sentences with multisyllabic words and corresponding International Phonetic Alphabet (IPA) transcription.*

| Korean sentences | IPA Transcription        | Vowel selected for VSA calculation |
|------------------|--------------------------|------------------------------------|
| 바다 보러 가요*        | [bada boɾʌ gaʝo]         | /a/ in [gaʝo]                      |
| 짜장면 꼭 시켜*        | [tɕʌdʒaŋmjʌn kɔk sikʰjʌ] | /i/ in [sikʰjʌ]                    |
| 큰 바위가 보여         | [kʰʷʌn bawiga boʝʌ]      | --                                 |
| 쌈장이 너무 짜*        | [sʰamdʒaŋʝi nʌmu tɕʌ]    | /u/ in [nʌmu]                      |

\* Sentence with corner vowels /a, i, u/ selected for sentence vowel space area (VSA) calculation.

*D. Reliability of acoustic measures: Pearson product–moment correlation between the first and second measurements and mean absolute difference.*

|                    | <b>Word</b>         |                                        | <b>Sentence</b>     |                                        |
|--------------------|---------------------|----------------------------------------|---------------------|----------------------------------------|
|                    | Pearson correlation | Mean absolute difference ( <i>SD</i> ) | Pearson correlation | Mean absolute difference ( <i>SD</i> ) |
| SPL (dB)           | 0.98                | 0.21 (0.24)                            | 0.99                | 0.17 (0.06)                            |
| Duration (seconds) | 0.96                | 0.09 (0.04)                            | 0.98                | 0.14 (0.09)                            |
| VSA formants (Hz)  | 0.90                | 122 (59)                               | 0.89                | 179 (81)                               |

*Note.* VSA = Vowel space area.

*E. Reliability of intelligibility-related measures: Intraclass correlation coefficient (ICC) and corresponding 95% confidence interval.*

|              |     | <b>Intra-listener reliability</b> |                  | <b>Inter-listener reliability</b>  |
|--------------|-----|-----------------------------------|------------------|------------------------------------|
|              |     | Single ICC [CI]                   | Average ICC [CI] | Average ICC range [CI]             |
| Word         | EoU | 0.80 [.77, .83]                   | 0.85 [.83, .87]  | 0.75 [.73, .77] to 0.82 [.79, .85] |
|              | PWC | 0.90 [.87, .93]                   | 0.93 [.91, .95]  | 0.90 [.88, .92] to 0.96 [.93, .99] |
| Sentence EoU |     | 0.83 [.80, .87]                   | 0.85 [.81, .89]  | 0.85 [.81, .89] to 0.89 [.86, .92] |

*Note.* ICC = Intraclass correlation coefficient; EoU = Ease of Understanding; PWC = Percentage of words correctly transcribed; CI = 95% confidence interval.
