# Supplementary material
Source: publisher figshare collection journal article supplement (https://asha.figshare.com/articles/dataset/_/25521052)
Supplement: Supplementary file 2 [file 1]

**Supplemental Material S2.** Individual participant data for (A) word-level acoustic and intelligibility measures and (B) sentence-level acoustic and intelligibility measures.

A. Individual participant data for word-level acoustic and intelligibility measures.

| Participants | Acoustic measures          |      |      |                              |       |       |                           |      |      | Intelligibility-related measures |      |      |                                            |       |       |
|--------------|----------------------------|------|------|------------------------------|-------|-------|---------------------------|------|------|----------------------------------|------|------|--------------------------------------------|-------|-------|
|              | Word duration<br>(seconds) |      |      | Sound Pressure Level<br>(dB) |       |       | Vowel Space Area<br>(log) |      |      | Ease of Understanding<br>(%)     |      |      | Percent Words correctly transcribed<br>(%) |       |       |
|              | Hab                        | BM   | SV   | Hab                          | BM    | SV    | Hab                       | BM   | SV   | Hab                              | BM   | SV   | Hab                                        | BM    | SV    |
| CP01         | 0.65                       | 0.73 | 0.74 | 81.85                        | 80.78 | 82.03 | 4.71                      | 5.30 | 5.65 | 0.65                             | 0.73 | 0.74 | 81.85                                      | 80.78 | 82.03 |
| CP02         | 0.26                       | 0.46 | 0.40 | 81.96                        | 84.66 | 84.87 | 5.40                      | 5.13 | 5.24 | 0.26                             | 0.46 | 0.40 | 81.96                                      | 84.66 | 84.87 |
| CP03         | 0.41                       | 0.50 | 0.42 | 81.20                        | 79.42 | 80.74 | 4.65                      | 5.45 | 5.23 | 0.41                             | 0.50 | 0.42 | 81.20                                      | 79.42 | 80.74 |
| CP04         | 0.63                       | 0.77 | 0.72 | 81.83                        | 82.98 | 83.57 | 5.18                      | 5.02 | 4.74 | 0.63                             | 0.77 | 0.72 | 81.83                                      | 82.98 | 83.57 |
| CP05         | 0.28                       | 0.45 | 0.28 | 76.45                        | 74.41 | 79.88 | 4.81                      | 5.02 | 5.04 | 0.28                             | 0.45 | 0.28 | 76.45                                      | 74.41 | 79.88 |
| CP06         | 0.25                       | 0.38 | 0.28 | 84.84                        | 82.24 | 84.32 | 5.61                      | 5.32 | 5.20 | 0.25                             | 0.38 | 0.28 | 84.84                                      | 82.24 | 84.32 |
| CP07         | 0.34                       | 0.55 | 0.62 | 85.10                        | 82.44 | 84.24 | 3.68                      | 4.66 | 3.67 | 0.34                             | 0.55 | 0.62 | 85.10                                      | 82.44 | 84.24 |
| CP08         | 0.32                       | 0.81 | 0.65 | 81.69                        | 84.78 | 84.34 | 4.41                      | 4.37 | 3.79 | 0.32                             | 0.81 | 0.65 | 81.69                                      | 84.78 | 84.34 |
| CP09         | 0.35                       | 0.48 | 0.38 | 80.44                        | 80.27 | 84.25 | 4.55                      | 4.64 | 4.88 | 0.35                             | 0.48 | 0.38 | 80.44                                      | 80.27 | 84.25 |
| CP10         | 0.34                       | 0.43 | 0.34 | 74.41                        | 78.67 | 77.87 | 4.56                      | 5.09 | 4.77 | 0.34                             | 0.43 | 0.34 | 74.41                                      | 78.67 | 77.87 |
| CP11         | 0.32                       | 0.38 | 0.32 | 72.24                        | 77.17 | 78.91 | 4.75                      | 5.55 | 5.25 | 0.32                             | 0.38 | 0.32 | 72.24                                      | 77.17 | 78.91 |
| CP12         | 0.34                       | 0.60 | 0.47 | 79.25                        | 80.47 | 83.95 | 5.18                      | 5.33 | 5.40 | 0.34                             | 0.60 | 0.47 | 79.25                                      | 80.47 | 83.95 |
| CP13         | 0.30                       | 0.46 | 0.39 | 82.44                        | 82.64 | 83.53 | 5.25                      | 5.26 | 5.37 | 0.30                             | 0.46 | 0.39 | 82.44                                      | 82.64 | 83.53 |
| CP14         | 0.43                       | 0.62 | 0.55 | 81.45                        | 81.33 | 82.92 | 5.37                      | 5.36 | 5.69 | 0.43                             | 0.62 | 0.55 | 81.45                                      | 81.33 | 82.92 |
| CP15         | 0.30                       | 0.45 | 0.37 | 74.23                        | 82.84 | 84.07 | 5.51                      | 5.40 | 5.57 | 0.30                             | 0.45 | 0.37 | 74.23                                      | 82.84 | 84.07 |

*Note.* dB = decibels (measured at 10cm distance); Hab = Habitual; BM = Big Mouth; SV = Strong Voice.

B. Individual participant data for sentence-level acoustic and intelligibility measures.

| Participants | Acoustic measures              |      |      |                              |       |       |                           |      |      |                                         |      |      | Intelligibility-related measures |       |       |
|--------------|--------------------------------|------|------|------------------------------|-------|-------|---------------------------|------|------|-----------------------------------------|------|------|----------------------------------|-------|-------|
|              | Sentence duration<br>(seconds) |      |      | Sound Pressure Level<br>(dB) |       |       | Vowel Space Area<br>(log) |      |      | Articulation rate<br>(syllables/second) |      |      | Ease of Understanding<br>(%)     |       |       |
|              | Hab                            | BM   | SV   | Hab                          | BM    | SV    | Hab                       | BM   | SV   | Hab                                     | BM   | SV   | Hab                              | BM    | SV    |
| CP01         | 3.19                           | 4.76 | 4.61 | 80.07                        | 78.39 | 81.29 | 4.32                      | 4.72 | 4.36 | 1.88                                    | 1.26 | 1.30 | 51.98                            | 32.61 | 59.03 |
| CP02         | 1.53                           | 2.14 | 1.85 | 82.61                        | 83.31 | 83.43 | 5.43                      | 5.43 | 5.49 | 3.92                                    | 2.80 | 3.24 | 89.64                            | 95.34 | 96.96 |
| CP03         | 1.88                           | 2.6  | 1.87 | 78.95                        | 76.05 | 80.85 | 5.17                      | 5.37 | 5.45 | 3.19                                    | 2.31 | 3.21 | 96.12                            | 92.03 | 96.95 |
| CP04         | 3.83                           | 4.98 | 6.54 | 78.52                        | 80.31 | 81.39 | 4.65                      | 5.06 | 4.72 | 1.57                                    | 1.20 | 0.92 | 37.15                            | 34.71 | 45.10 |
| CP05         | 1.33                           | 1.92 | 1.35 | 69.45                        | 74.53 | 77.86 | 5.26                      | 4.75 | 4.73 | 4.51                                    | 3.13 | 4.44 | 71.08                            | 51.81 | 83.06 |
| CP06         | 1.43                           | 2.06 | 1.48 | 83.75                        | 82.36 | 82.84 | 5.23                      | 5.46 | 4.52 | 4.20                                    | 2.91 | 4.05 | 55.58                            | 68.84 | 59.66 |
| CP07         | 3.14                           | 3.76 | 2.14 | 81.79                        | 80.99 | 81.43 | 4.37                      | 4.27 | 3.68 | 1.91                                    | 1.60 | 2.80 | 10.82                            | 10.56 | 16.86 |
| CP08         | 2.64                           | 3.67 | 3.68 | 82.59                        | 82.85 | 82.23 | 3.45                      | 3.6  | 3.7  | 2.27                                    | 1.63 | 1.63 | 5.33                             | 4.76  | 6.95  |
| CP09         | 1.56                           | 2.05 | 1.78 | 82.13                        | 81.38 | 84.05 | 5.22                      | 5.37 | 5.25 | 3.85                                    | 2.93 | 3.37 | 96.86                            | 97.49 | 96.85 |
| CP10         | 2.53                           | 2.7  | 2    | 69.44                        | 75.1  | 71.15 | 5.46                      | 5.62 | 5.28 | 2.37                                    | 2.22 | 3.00 | 45.78                            | 59.40 | 48.45 |
| CP11         | 2.22                           | 2.94 | 2.21 | 72.78                        | 70.79 | 73.78 | 4.71                      | 5.27 | 5.43 | 2.70                                    | 2.04 | 2.71 | 41.88                            | 37.14 | 45.34 |
| CP12         | 1.52                           | 2.68 | 1.84 | 77.68                        | 80.6  | 82.99 | 5.1                       | 5.38 | 5.5  | 3.95                                    | 2.24 | 3.26 | 92.51                            | 94.86 | 96.80 |
| CP13         | 1.39                           | 2.05 | 1.66 | 80.01                        | 82.92 | 82.95 | 5.29                      | 5.58 | 5.41 | 4.32                                    | 2.93 | 3.61 | 93.31                            | 94.70 | 92.95 |
| CP14         | 1.85                           | 2.74 | 1.99 | 79.43                        | 81.18 | 82.53 | 5                         | 5.54 | 5.68 | 3.24                                    | 2.19 | 3.02 | 90.02                            | 96.84 | 98.06 |
| CP15         | 1.37                           | 2.55 | 1.85 | 73.91                        | 79.8  | 83.55 | 5.53                      | 5.81 | 5.58 | 4.38                                    | 2.35 | 3.24 | 95.75                            | 97.50 | 98.45 |

Note. dB = decibels (measured at 10cm distance); Hab = Habitual; BM = Big Mouth; SV = Strong Voice.
